# Supplementary material for: Clinical Significance of the Immunohistochemical Expression of Histone Deacetylases (HDACs)-2, -4, and -5 in Ovarian Adenocarcinomas
Source: MDPI journal article supplement (doi:10.3390/biomedicines12050947), 2024-04-24

Figure S1. Different staining intensities in the expression of HDAC-2, HDAC-4 and HDAC-5 in ovarian carcinomas.

- A. Mild HDAC-2 expression (x400)
- B. Moderate HDAC-2 expression (x400)
- C. Intense HDAC-2 expression (x400)
- D. Mild HDAC-4 expression (x400)
- E. Moderate HDAC-2 expression (x400)
- F. Mild HDAC-5 expression (x400)
- G. Moderate HDAC-5 expression (x400)
- H. Intense HDAC-5 expression (x400)

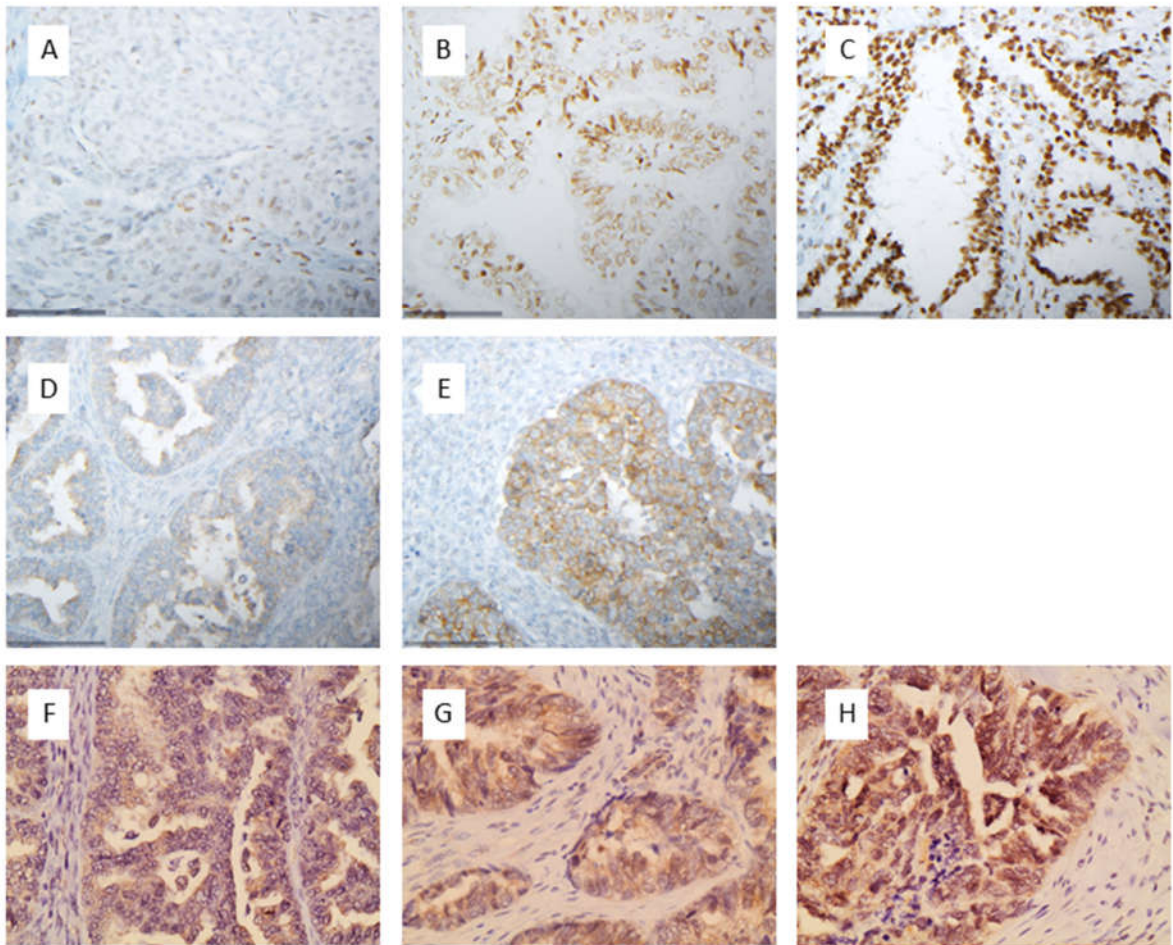

Figure S2. Graphical representation of the association between HDAC-4 and cytoplasmic HDAC-5 expression (first panel) as well as between HDAC-4 and nuclear HDAC-5 expression (second panel).

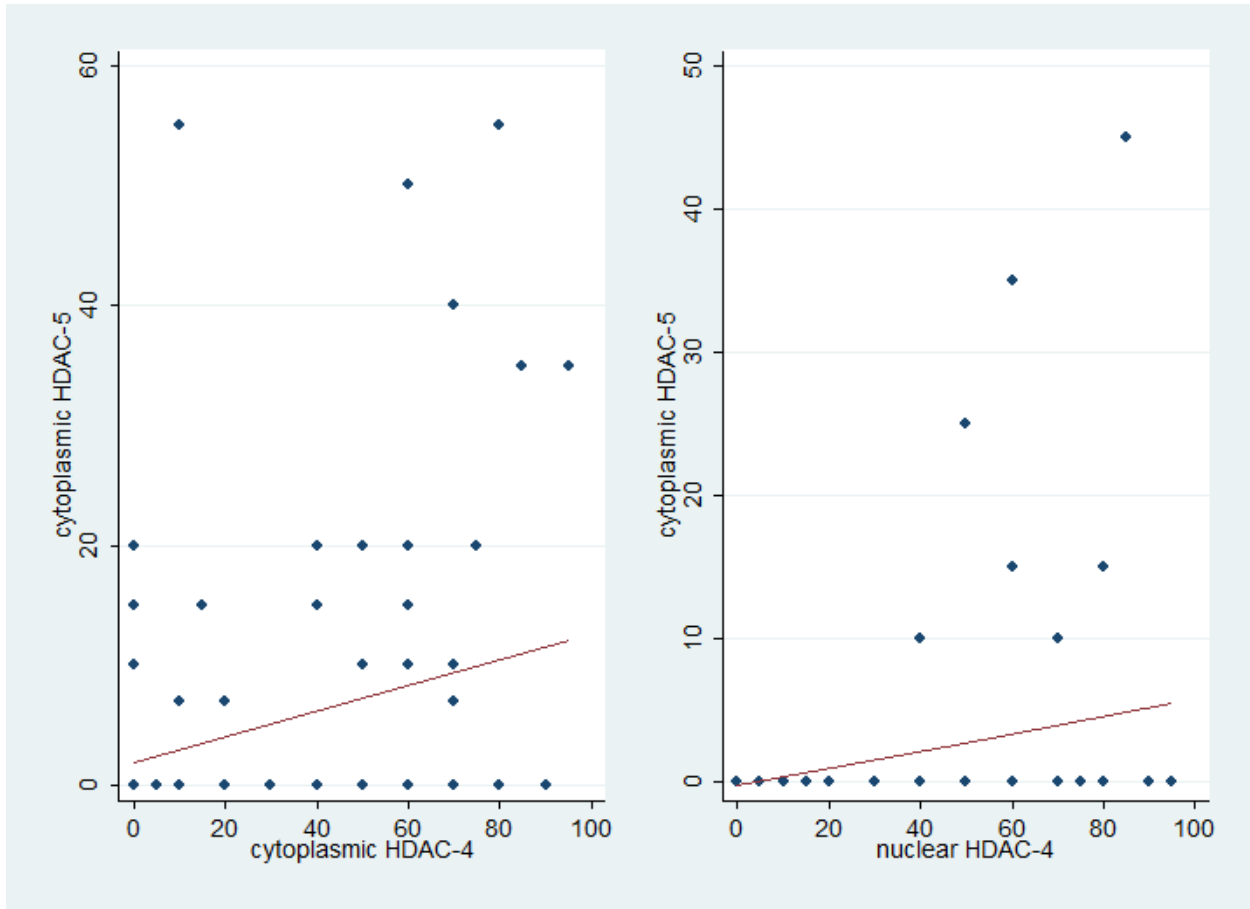

Supplement: s1 [file s1]
